# Supplementary material
Source: PubMed Central journal article supplement (PMC7042821)
Supplement: jamadermatol-156-458-s001.pdf [file jamadermatol-156-458-s001.pdf]

## Supplementary Online Content

Singer S, Tkachenko E, Hartman RI, Mostaghimi A. Gender identity and lifetime prevalence of skin cancer in the United States. *JAMA Dermatology*. Published online February 12, 2020. doi:10.1001/jamadermatol.2019.4197

**eTable.** Univariate Odds Ratios for Lifetime Diagnosis of Skin Cancer Diagnosis among Respondents who Provided Gender Identity.

This supplementary material has been provided by the authors to give readers additional information about their work.

**eTable. Univariate Odds Ratios for Lifetime Diagnosis of Skin Cancer Diagnosis among Respondents who Provided Gender Identity.**

|                          | <b>Skin Cancer Prevalence<br/>% (95% CI)</b> | <b>OR (95% CI)</b>     | <b>p-value</b> |
|--------------------------|----------------------------------------------|------------------------|----------------|
| <b>Region</b>            |                                              |                        |                |
| Northeast                | 5.68 (5.52, 5.84)                            | <i>1.0 [reference]</i> | -              |
| South                    | 7.32 (7.14, 7.49)                            | 1.31 (1.26, 1.36)      | <.001          |
| Midwest                  | 6.04 (5.91, 6.16)                            | 1.07 (1.03, 1.11)      | <.001          |
| West                     | 6.08 (5.81, 6.36)                            | 1.08 (1.02, 1.14)      | .012           |
| <b>Race/Ethnicity</b>    |                                              |                        |                |
| Non-Hispanic White       | 9.53 (9.39, 9.68)                            | <i>1.0 [reference]</i> | -              |
| Non-Hispanic Black       | 0.42 (0.33, 0.50)                            | 0.04 (0.03, 0.05)      | <.001          |
| Hispanic                 | 1.61 (1.42, 1.80)                            | 0.16 (0.14, 0.18)      | <.001          |
| Other                    | 1.01 (0.85, 1.17)                            | 0.10 (0.08, 0.11)      | <.001          |
| <b>Education Level</b>   |                                              |                        |                |
| High school or less      | 5.31 (5.16, 5.46)                            | <i>1.0 [reference]</i> | -              |
| Some college or more     | 7.33 (7.20, 7.47)                            | 1.41 (1.36, 1.46)      | <.001          |
| <b>Employment Status</b> |                                              |                        |                |
| Unemployed               | 3.88 (3.77, 3.99)                            | <i>1.0 [reference]</i> | -              |
| Employed                 | 9.92 (9.73, 10.10)                           | 2.73 (2.63, 2.83)      | <.001          |
| <b>Insurance Status</b>  |                                              |                        |                |
| Yes                      | 7.11 (7.00, 7.23)                            | <i>1.0 [reference]</i> | -              |
| No                       | 1.66 (1.49, 1.84)                            | 0.22 (0.20, 0.25)      | <.001          |
| <b>Smoking History</b>   |                                              |                        |                |
| Never Smoker             | 5.48 (5.36, 5.61)                            | <i>1.0 [reference]</i> | -              |
| Former Smoker            | 10.3 (10.0, 10.5)                            | 1.97 (1.90, 2.04)      | <.001          |
| Current Smoker           | 4.32 (4.10, 4.54)                            | 0.78 (0.73, 0.82)      | <.001          |
| <b>Alcohol Use</b>       |                                              |                        |                |
| Non-drinker              | 6.36 (6.22, 6.51)                            | <i>1.0 [reference]</i> | -              |

|                               |                   |                        |       |
|-------------------------------|-------------------|------------------------|-------|
| Light Drinker                 | 6.54 (6.38, 6.70) | 1.03 (0.99, 1.07)      | 0.112 |
| Moderate/Heavy Drinker        | 6.91 (6.58, 7.23) | 1.09 (1.03, 1.16)      | 0.002 |
| <b>Other Cancer Diagnosis</b> |                   |                        |       |
| No                            | 5.48 (5.39, 5.58) | <i>1.0 [reference]</i> | -     |
| Yes                           | 19.7 (19.1, 20.3) | 4.23 (4.05, 4.42)      | <.001 |
